# Supplementary material for: The Gut Microbiome, Seleno-Compounds, and Acute Myocardial Infarction
Source: MDPI journal article supplement (doi:10.3390/jcm11051462), 2022-03-07
Supplement: s1 [file s1]

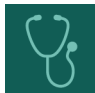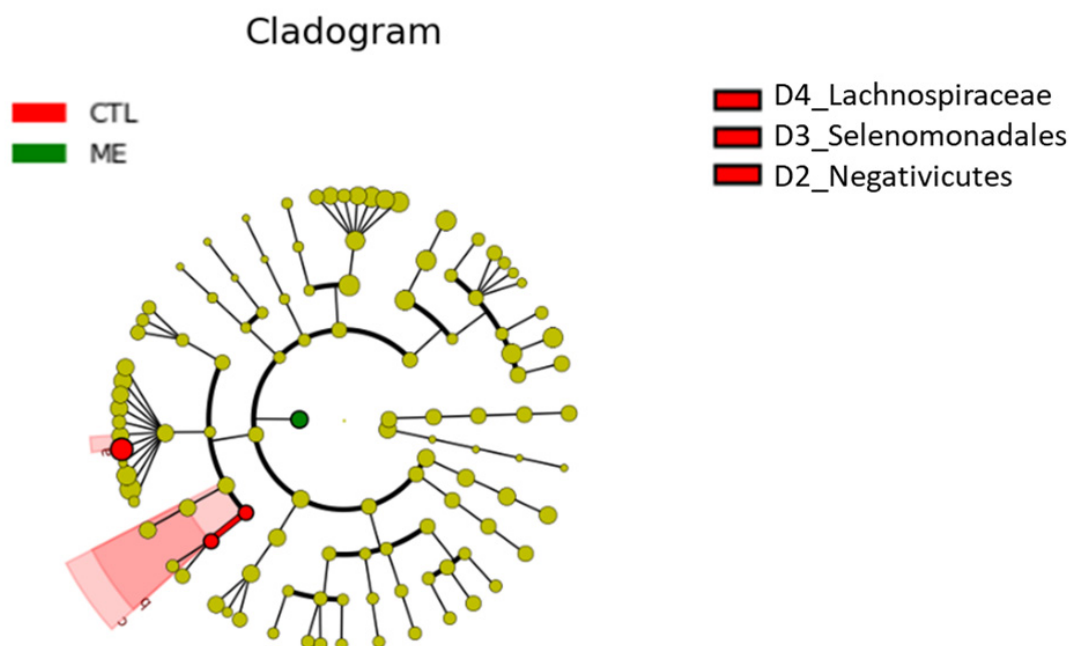

■

**Figure S1.** Cladogram showing different abundant taxa at Family level. Alphabets correspond to those in parentheses (CTL: control; ME: AMI).

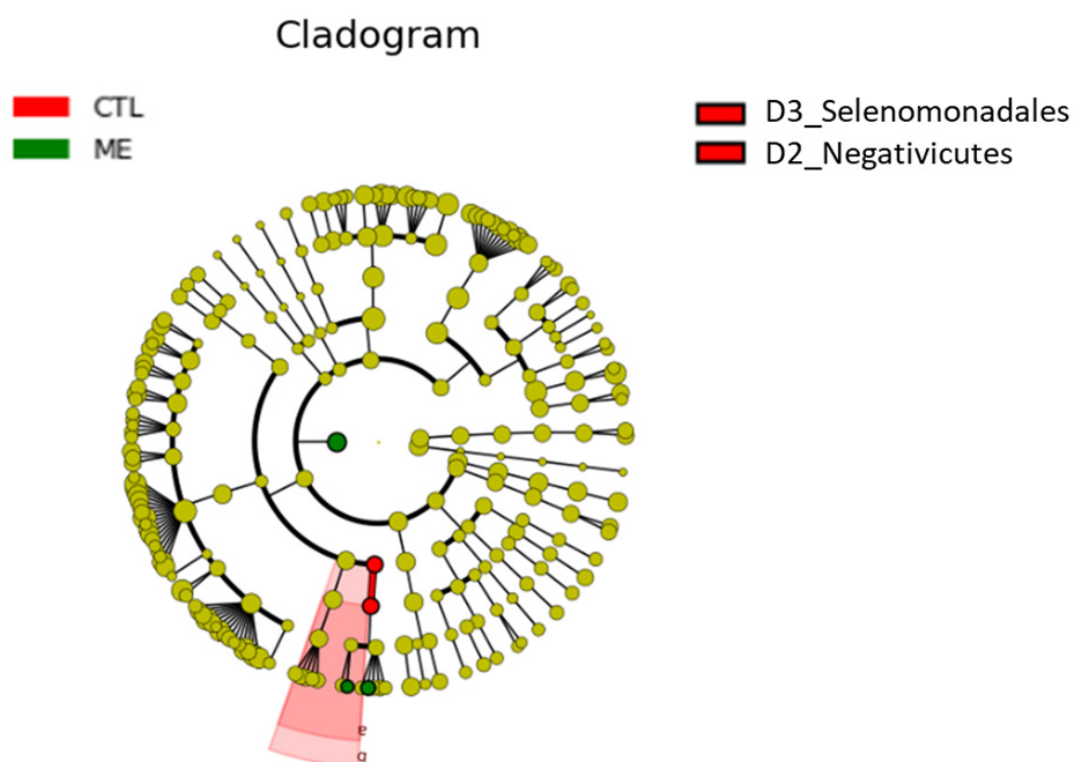

**Figure S2.** Cladogram showing different abundant taxa at Genus level. Alphabets correspond to those in parentheses (CTL: control; ME: AMI).

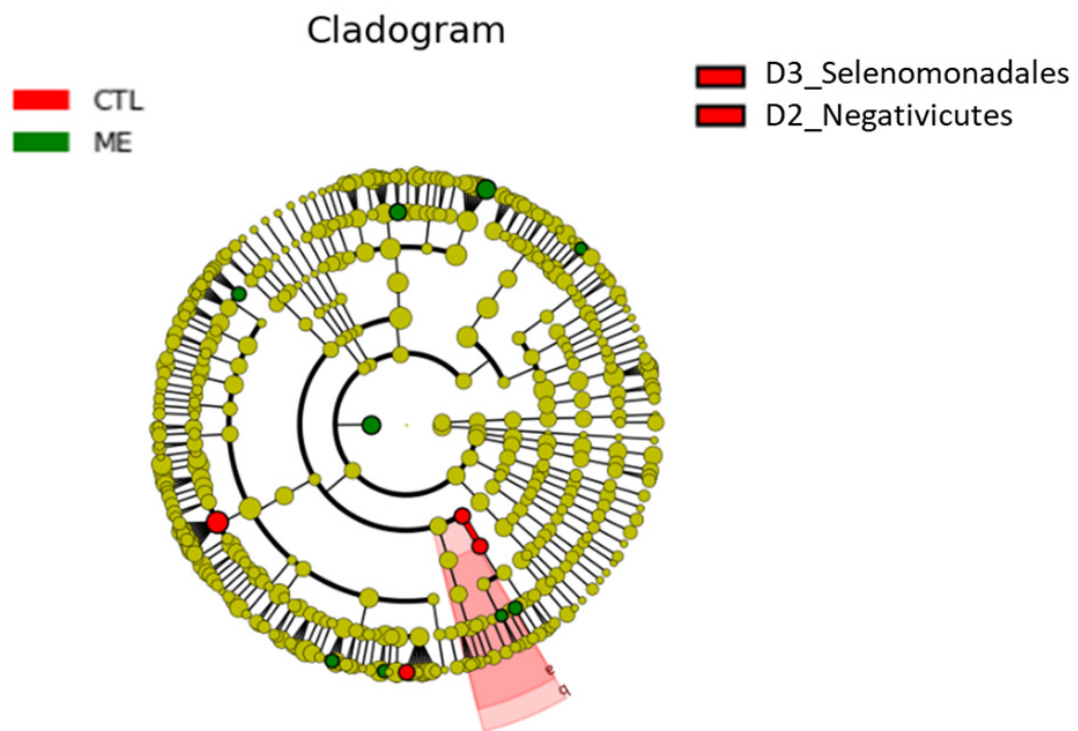

**Figure S3.** Cladogram showing different abundant taxa at Species level. Alphabets correspond to those in parentheses (CTL: control; ME: AMI).
